# Supplementary material for: Metabolomic Biomarkers of Dietary Approaches to Stop Hypertension (DASH) Dietary Patterns in Pregnant Women
Source: MDPI journal article supplement (doi:10.3390/nu16040492), 2024-02-08
Supplement: s1 [file s1]

## Supplement Materials

**Supplementary Table S1.** Associations of 92 individual fasting plasma metabolites with DASH score in linear regressions, the Fetal Growth Studies–Singleton Cohort (FGS).

| Superclass                       | Class/Subclass                             | Metabolites                | Coefficient | <i>P</i> -values <sup>1</sup> | Adjusted <i>P</i> -values <sup>2</sup> | Food group    |
|----------------------------------|--------------------------------------------|----------------------------|-------------|-------------------------------|----------------------------------------|---------------|
| Benzenoids                       | Benzoic acids                              | Benzoic acid               | 0.11        | 0.008                         | 0.04                                   | Low fat dairy |
| Homogeneous non-metal compounds  | Homogeneous other non-metal compounds      | Hydroxylamine              | 0.27        | <0.001                        | 0.01                                   |               |
| Organic acids and derivatives    | Amino acids                                | Asparagine                 | 0.13        | 0.005                         | 0.03                                   | Sodium        |
|                                  |                                            | Beta-alanine               | 0.18        | 0.004                         | 0.03                                   | Low fat dairy |
|                                  |                                            | Glutamic acid              | -0.20       | 0.005                         | 0.03                                   |               |
|                                  |                                            | Glycine                    | -0.19       | <0.001                        | 0.003                                  | Low fat dairy |
|                                  |                                            | N-acetylmethionine         | 0.28        | 0.004                         | 0.03                                   |               |
|                                  |                                            | Taurine                    | -0.49       | 0.002                         | 0.02                                   |               |
| Organic oxygen compounds         | Amino acid derivatives                     | Hydroxycarbamate           | 0.32        | <0.001                        | <0.001                                 | Low fat dairy |
|                                  | Short-chain hydroxy acids/ Monosaccharides | 2,3-dihydroxybutanoic acid | 0.22        | 0.003                         | 0.02                                   | Sodium        |
|                                  | Carbohydrate/ Disaccharides                | Maltose                    | -0.40       | 0.003                         | 0.02                                   |               |
|                                  | Carbohydrate/ Monosaccharides              | Xylitol                    | 0.16        | 0.001                         | 0.01                                   |               |
| Organoheterocyclic compounds     | Vitamin B3                                 | Nicotinic acid             | 0.50        | 0.003                         | 0.02                                   | Fruit         |
|                                  | Pyrrolidines                               | Maleimide                  | 0.25        | 0.006                         | 0.04                                   |               |
| Lipids and lipids-like molecules | Prenol lipids/ Vitamin E                   | Gamma-tocopherol           | -0.19       | 0.004                         | 0.03                                   |               |
|                                  | Fatty Acyls                                | Acylcarnitine C18:2        | -0.17       | 0.008                         | 0.04                                   |               |
|                                  |                                            | Adipic acid                | 0.17        | 0.003                         | 0.02                                   |               |

|               |                     |      |        |        |                        |
|---------------|---------------------|------|--------|--------|------------------------|
| Glycerolipids | Dodecanoic acid     | 0.22 | 0.002  | 0.02   | Fruit & Low fat dairy  |
|               | DG (34:1)           | 0.22 | 0.004  | 0.03   | Fruit & Low fat dairy  |
|               | DG (38:5)           | 0.18 | 0.005  | 0.03   |                        |
|               | TG (14:0/14:0/14:0) | 0.61 | 0.002  | 0.02   | Low fat dairy          |
|               | TG (44:1)           | 0.69 | 0.001  | 0.01   | Low fat dairy          |
|               | TG (44:1)           | 0.61 | <0.001 | 0.008  | Low fat dairy          |
|               | TG (46:0)           | 0.67 | <0.001 | 0.002  | Low fat dairy          |
|               | TG (46:1)           | 0.66 | <0.001 | 0.002  | Low fat dairy          |
|               | TG (46:1)           | 0.55 | <0.001 | 0.002  | Low fat dairy          |
|               | TG (46:2)           | 0.55 | 0.003  | 0.02   | Low fat dairy          |
|               | TG (46:2)           | 0.49 | 0.001  | 0.01   | Low fat dairy          |
|               | TG (48:0)           | 0.49 | <0.001 | 0.01   |                        |
|               | TG (48:0)           | 0.43 | 0.002  | 0.02   |                        |
|               | TG (48:1)           | 0.40 | <0.001 | 0.003  | Low fat dairy          |
|               | TG (48:1)           | 0.42 | <0.001 | 0.001  | Low fat dairy          |
|               | TG (48:2)           | 0.40 | <0.001 | 0.004  | Low fat dairy          |
|               | TG (48:2)           | 0.31 | <0.001 | 0.002  | Low fat dairy          |
|               | TG (48:3)           | 0.26 | 0.010  | 0.05   | Low fat dairy          |
|               | TG (49:0)           | 0.47 | <0.001 | 0.004  | Low fat dairy          |
|               | TG (49:0)           | 0.40 | <0.001 | 0.003  | Low fat dairy          |
|               | TG (49:1)           | 0.42 | <0.001 | 0.003  | Low fat dairy          |
|               | TG (49:1)           | 0.38 | <0.001 | <0.001 | Low fat dairy          |
|               | TG (49:2)           | 0.31 | 0.003  | 0.02   | Low fat dairy & sodium |
|               | TG (49:2)           | 0.29 | <0.001 | 0.00   | Low fat dairy          |

|                      |            |       |        |        |                         |
|----------------------|------------|-------|--------|--------|-------------------------|
| Glycerophospholipids | TG (49:3)  | 0.23  | 0.007  | 0.04   | Low fat dairy & sodium  |
|                      | TG (50:0)  | 0.28  | 0.009  | 0.05   |                         |
|                      | TG (50:1)  | 0.21  | 0.003  | 0.02   |                         |
|                      | TG (50:1)  | 0.20  | <0.001 | 0.00   |                         |
|                      | TG (51:1)  | 0.31  | 0.004  | 0.03   | Low fat dairy           |
|                      | TG (52:2)  | -0.08 | 0.001  | 0.01   |                         |
|                      | TG (53:4)  | -0.18 | 0.010  | 0.05   | Red & processed meat    |
|                      | TG (54:3)  | -0.16 | 0.003  | 0.02   |                         |
|                      | TG (54:3)  | -0.15 | <0.001 | 0.01   |                         |
|                      | TG (54:6)  | -0.27 | 0.006  | 0.04   |                         |
|                      | TG (56:1)  | 0.36  | 0.003  | 0.02   | Low fat dairy           |
|                      | TG (56:1)  | 0.36  | 0.002  | 0.02   | Low fat dairy           |
|                      | TG (58:1)  | 0.38  | 0.004  | 0.03   | Low fat dairy           |
|                      | TG (58:1)  | 0.81  | <0.001 | <0.001 | Low fat dairy           |
|                      | TG (58:2)  | 0.29  | 0.005  | 0.03   | Low fat dairy           |
|                      | TG (58:8)  | 0.31  | 0.009  | 0.05   |                         |
|                      | TG (60:2)  | 0.31  | 0.007  | 0.04   | Fruit & low fat dairy   |
|                      | TG (60:2)  | 0.25  | 0.007  | 0.04   | Low fat dairy           |
|                      | LPC (14:0) | 0.22  | 0.007  | 0.04   | Low fat dairy; & sodium |
|                      | PC (28:0)  | 0.53  | <0.001 | 0.002  | Low fat dairy           |
|                      | PC (30:0)  | 0.38  | <0.001 | <0.001 | Low fat dairy & sodium  |
|                      | PC (30:1)  | 0.42  | <0.001 | 0.004  | Low fat dairy & sodium  |

|             |      |        |       |                                                 |
|-------------|------|--------|-------|-------------------------------------------------|
| PC (31:0)   | 0.25 | <0.001 | 0.002 | Low fat dairy & whole grain & sodium            |
| PC (32:1)   | 0.33 | <0.001 | 0.001 | Low fat dairy                                   |
| PC (32:3)   | 0.34 | <0.001 | 0.001 | Low fat dairy                                   |
| PC (33:0)   | 0.23 | <0.001 | 0.004 | Low fat dairy & sodium                          |
| PC (33:1)   | 0.25 | <0.001 | 0.001 | Low fat dairy & whole grain & sodium            |
| PC (34:1)   | 0.11 | <0.001 | 0.00  | Low fat dairy & sodium                          |
| PC (34:4)   | 0.25 | 0.002  | 0.02  | Low fat dairy & sodium                          |
| PC (35:1)   | 0.19 | <0.001 | 0.01  | Low fat dairy & sodium                          |
| PC (35:3)   | 0.23 | <0.001 | 0.00  | Low fat dairy & sodium                          |
| PC (36:1)   | 0.15 | <0.001 | 0.002 | Low fat dairy & sodium                          |
| PC (36:3) B | 0.24 | <0.001 | 0.01  | Low fat dairy & sodium                          |
| PC (36:4) C | 0.07 | <0.001 | 0.001 | Fruit                                           |
| PC (36:5) B | 0.41 | <0.001 | 0.002 |                                                 |
| PC (36:6)   | 0.35 | <0.001 | 0.002 | Low fat dairy & sodium                          |
| PC (37:3)   | 0.20 | 0.002  | 0.02  | Low fat dairy & sodium & red and processed meat |
| PC (38:2)   | 0.20 | <0.001 | 0.01  | Low fat dairy & sodium                          |

|               |             |      |        |        |                        |
|---------------|-------------|------|--------|--------|------------------------|
| Sphingolipids | PC (38:3)   | 0.23 | <0.001 | <0.001 | Low fat dairy & sodium |
|               | PC (38:4) B | 0.16 | <0.001 | <0.001 | Low fat dairy & sodium |
|               | PC (38:5) A | 0.15 | <0.001 | 0.01   |                        |
|               | PC (42:5)   | 0.17 | 0.004  | 0.03   | Low fat dairy & sodium |
|               | PC (42:6)   | 0.60 | <0.001 | <0.001 | Low fat dairy          |
|               | SM (d30:1)  | 0.30 | <0.001 | 0.004  | Low fat dairy & sodium |
|               | SM (d32:0)  | 0.29 | <0.001 | 0.003  | Low fat dairy & sodium |
|               | SM (d32:1)  | 0.23 | <0.001 | 0.01   | Low fat dairy & sodium |
|               | SM (d40:2)  | 0.17 | 0.006  | 0.04   | Low fat dairy & sodium |
|               | SM (d43:1)  | 0.35 | 0.010  | 0.05   | Low fat dairy & sodium |
| Sterol lipids | CE (20:3)   | 0.58 | <0.001 | 0.003  |                        |
|               | CE (20:5)   | 0.36 | 0.007  | 0.04   | Fruit                  |
|               | CE (20:5)   | 0.40 | 0.004  | 0.03   |                        |

<sup>1</sup> Linear regression models were adjusted for age (years), race (non-Hispanic White, non-Hispanic Black, Hispanic, Asian & Pacific Islander), education (high-school degree or less, associated degree, bachelor's degree or more), pre-pregnancy BMI (kg/m<sup>2</sup>), physical activity (metabolic equivalent hours per week).

<sup>2</sup> Benjamini-Hochberg procedure was applied to adjust the multiple comparisons and statistical significance was considered for the false discovery rates (FDRs) <0.05.

Abbreviations: BMI, body mass index; CE, cholesteryl ester; DASH, Dietary Approaches to Stop Hypertension; DG, glycerolipids; FDR, false discovery rate; NICHD, National Institute of Child Health and Human Development; PC, phosphatidylcholine; SM, sphingomyelin; TG, triacylglycerol.
